# Supplementary material for: Diagnosis of Obstructive Sleep Apnea in Adults Using the Cardiopulmonary Coupling-Derived Software-Generated Apnea-Hypopnea Index
Source: PubMed Central journal article supplement — Clin Exp Otorhinolaryngol. 2020 Oct 15;14(4):424–6. doi: 10.21053/ceo.2020.01984 (PMC8606287; doi:10.21053/ceo.2020.01984), 2020-10-15
Supplement: ceo-2020-01984-suppl1.pdf [file ceo-2020-01984-suppl1.pdf]

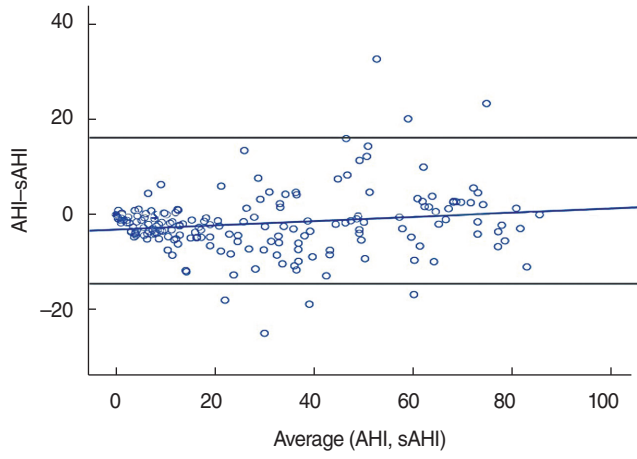

Supplementary Fig. 1. Bland-Altman analysis of the apnea-hypopnea index (AHI) and software-generated AHI (sAHI).
